# Supplementary material for: Genome-Wide Identification and Gene Expression Analysis of the OTU DUB Family in Oryza sativa
Source: MDPI journal article supplement (doi:10.3390/v14020392), 2022-02-14
Supplement: s1 [file s1]

Table S1. List of primers used for relative expression level

| Gene      | Primer        | Primer sequence       |
|-----------|---------------|-----------------------|
| OsUBQ     | RT-UBQ5-2F    | ACCACTTCGACCGCCACT    |
|           | RT-UBQ5-2R    | ACGCCTAAGCCTGCTGGTT   |
| RBSDV-S4  | RT-S4-F       | ATTTGCGTTTTGCAATTTCC  |
|           | RT-S4-R       | GCTCTACGACGACCAAATCC  |
| RBSDV-S6  | RT-S6-F       | AGCGTGTTGAAAACGAGATC  |
|           | RT-S6-R       | CGCTTTGCAAATTCAACAAG  |
| RBSDV-S10 | RT-S10-F      | AACAACCGACCAACAATCAC  |
|           | RT-S10-R      | GAGCAGGAACCTTCACGACAG |
| OsOTU1    | RT- OsOTU1-F  | AATCCTCCATAGGGGCGCGAA |
|           | RT- OsOTU1-R  | CCAACGCATCTGATAGGGCA  |
| OsOTU2    | RT- OsOTU2-F  | GTGCAGTCAGGTATTGGTCC  |
|           | RT- OsOTU2-R  | TTTGAGCTTCCAGACCCCAT  |
| OsOTU3    | RT- OsOTU3-F  | TCCATGTCAAGGTCCTGCAA  |
|           | RT- OsOTU3-R  | ATCCGCATCATCAGAACCCA  |
| OsOTU4    | RT- OsOTU4-F  | TGAAGCAGCTCAAGGCATGTA |
|           | RT- OsOTU4-R  | TCTGTGGTGCCTGATACTGTG |
| OsOTU5    | RT- OsOTU5-F  | TTCTATCCCGCACACTCCTC  |
|           | RT- OsOTU5-R  | CTGCTTCACGACTGACTTCCT |
| OsOTU6    | RT- OsOTU6-F  | TCGCCCAAGCAAAGAACAAC  |
|           | RT- OsOTU6-R  | TGTGATAATCGGGGTTGCGAA |
| OsOTU7    | RT- OsOTU7-F  | TTACCCCATGGTGCCAGTTC  |
|           | RT- OsOTU7-R  | CGTCATATGCCATGGGGACA  |
| OsOTU8    | RT- OsOTU8-F  | CGAACAAGATGATGCGCCAC  |
|           | RT- OsOTU8-R  | GCTCCAACCTGTGAAGGAGT  |
| OsOTU9    | RT- OsOTU9-F  | ATCAGAGGGCAAGGTCGAGT  |
|           | RT- OsOTU9-R  | ACCGAGTTGTAGTGCTCACC  |
| OsOTU10   | RT- OsOTU10-F | TGAAGCGTACTGTGCTTGGA  |
|           | RT- OsOTU10-R | GGGCCAATCGACCATTTGTG  |
| OsOTU11   | RT- OsOTU11-F | TCTGCCTCATTCCAATCCCC  |
|           | RT- OsOTU11-R | TATCGCTTGGCGACTGCTTT  |
| OsOTU12   | RT- OsOTU12-F | GACATGCCTTCCCGTGACAA  |
|           | RT- OsOTU12-R | TGCATGCCCCATGAATCACA  |
| OsOTU13   | RT- OsOTU13-F | ACATGTTTTGCCAGTTCGGG  |
|           | RT- OsOTU13-R | GACCCTCAGCATTTGCCTTC  |
| OsOTU14   | RT- OsOTU14-F | GGCGTTGGTGAAAGGAATGG  |
|           | RT- OsOTU14-R | CCATGGTACTCACGCTCTGG  |
| OsOTU15   | RT- OsOTU15-F | ACAAGTTCCACGCATTCCCT  |
|           | RT- OsOTU15-R | ATACTCGTCCTTGTGCGAGC  |
| OsOTU16   | RT- OsOTU16-F | GGAAAATCGCCTCCTTGCTG  |
|           | RT- OsOTU16-R | CAAGCCCAGCTATGTTCCGT  |
| OsOTU17   | RT- OsOTU17-F | ATGAGGCAAGCACGTCAAAC  |
|           | RT- OsOTU17-R | GAAGGCGATCTTCCTCACCC  |

|         |               |                      |
|---------|---------------|----------------------|
| OsOTU18 | RT- OsOTU18-F | CTCGTGTGTACGCAACCTCT |
|         | RT- OsOTU18-R | GCGGTCCAGATGCTTTTGT  |
| OsOTU19 | RT- OsOTU19-F | GCCAGCACTAACAAAGGGGA |
|         | RT- OsOTU19-R | TCTGCTCGCTGCCTCAAAAA |
| OsOTU20 | RT- OsOTU20-F | GAAGAGGGCACGATGTTGGG |
|         | RT- OsOTU20-R | GGTCGTTGATGGTCCTGTCT |

Table S2. The information of the *OTU* gene family in *Zea mays*

| number | Gene ID number    | Amino acid residues | OTU domain | PI   |
|--------|-------------------|---------------------|------------|------|
| 1      | > Zm00014a_002048 | 167                 | 93-165     | 9.20 |
| 2      | > Zm00014a_014232 | 227                 | 94-208     | 7.71 |
| 3      | > Zm00014a_034471 | 350                 | 214-327    | 5.29 |
| 4      | > Zm00014a_008936 | 300                 | 159-275    | 5.66 |
| 5      | > Zm00014a_002135 | 325                 | 177-316    | 6.25 |
| 6      | > Zm00014a_043358 | 355                 | 159-277    | 9.00 |
| 7      | > Zm00014a_019250 | 253                 | 105-249    | 9.25 |
| 8      | > Zm00014a_038080 | 309                 | 168-295    | 8.81 |
| 9      | > Zm00014a_021521 | 539                 | 243-356    | 5.22 |
| 10     | > Zm00014a_025365 | 310                 | 169-297    | 8.59 |
| 11     | > Zm00014a_043850 | 422                 | 83-210     | 6.74 |
| 12     | > Zm00014a_001469 | 536                 | 245-357    | 5.37 |
| 13     | > Zm00014a_015340 | 156                 | 11-131     | 6.96 |
| 14     | > Zm00001d_042481 | 159                 | 15-143     | 8.79 |
| 15     | > Zm00014a_044621 | 224                 | 94-204     | 8.97 |
