# Supplementary material for: Genome-Wide Identification and Gene Expression Analysis of the OTU DUB Family in Oryza sativa
Source: MDPI journal article supplement (doi:10.3390/v14020392), 2022-02-14
Supplement: s1 [file s1]

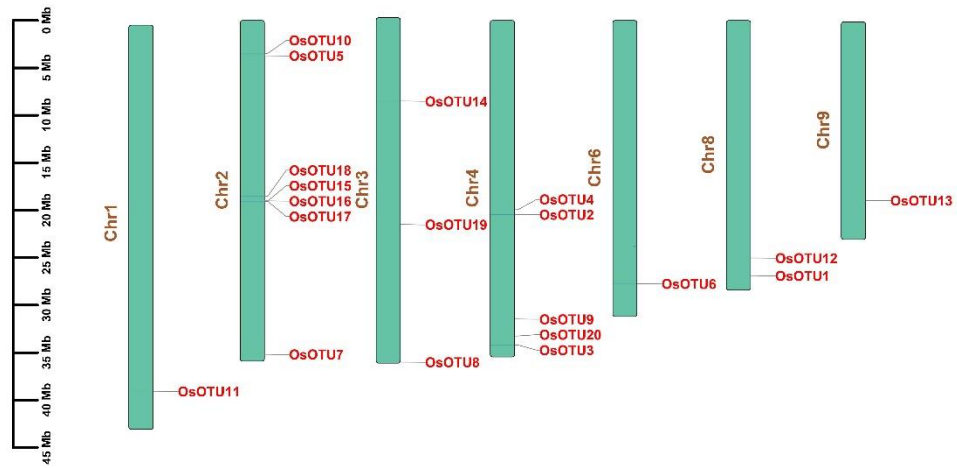

Figure S1. Chromosomal distribution and regional duplication of 20 OTU genes of *Oryza sativa*. The scale bar on the left indicated the length (Mb) of chromosomes.
